# Supplementary material for: Fibroblast growth factor-2, but not the adipose tissue-derived stromal cells secretome, inhibits TGF-β1-induced differentiation of human cardiac fibroblasts into myofibroblasts
Source: PubMed Central journal article supplement (PMC6226511; doi:10.1038/s41598-018-34747-3), 2018-11-09
Supplement: 41598_2018_34747_MOESM1_ESM.pdf [file 41598_2018_34747_MOESM1_ESM.pdf]

**Fibroblast growth factor-2, but not the adipose tissue-derived stromal cells secretome, inhibits TGF- $\beta$ 1-induced differentiation of human cardiac fibroblasts into myofibroblasts**

Tacia Tavares Aquinas Liguori<sup>1,2+</sup>, Gabriel Romero Liguori<sup>1,2+</sup>, Luiz Felipe Pinho Moreira<sup>1</sup>, Martin Conrad Harmsen<sup>2\*</sup>

1. Laboratório de Cirurgia Cardiovascular e Fisiopatologia da Circulação (LIM-11), Instituto do Coração (InCor), Hospital das Clinicas HCFMUSP, Faculdade de Medicina, Universidade de Sao Paulo, Sao Paulo, SP, BR

2. University of Groningen, University Medical Center Groningen, Department of Pathology and Medical Biology, Groningen the Netherlands.

+ These authors equally contributed to the manuscript.

**\*Corresponding author:**

Prof.dr. M.C. Harmsen

University of Groningen, University Medical Center Groningen, Dept. Pathology and Medical Biology, Hanzeplein 1 - EA11, 9713 GZ Groningen, the Netherlands.

e-mail: m.c.harmsen@umcg.nl

telephone: +31503614776/FAX: +31503619911

**Supplementary Table S1. Primer Sequences of Genes**

|                            | <b>Gene</b>          | <b>Forward Primer Sequence (5' – 3')</b> | <b>Reverse Primer Sequence (5' – 3')</b> |
|----------------------------|----------------------|------------------------------------------|------------------------------------------|
| <b>Reference Gene</b>      | <b><i>GAPDH</i></b>  | CTTGCCATCCTTCTCAAAGT                     | GCCCAATACGACCAAATCC                      |
| <b>Mesenchymal Markers</b> | <b><i>TAGLN</i></b>  | CTGAGGACTATGGGGTCATC                     | TAGTGCCCATCATTCTTGGT                     |
|                            | <b><i>ACTA</i></b>   | CTGTTCCAGCCATCCTTCAT                     | TCATGATGCTGTTGTAGGTGGT                   |
| <b>ECM Markers</b>         | <b><i>COL1A1</i></b> | GGGATTCCCTGGACCTAAAG                     | GGAACACCTCGCTCTCCA                       |
|                            | <b><i>COL3A1</i></b> | CTGGACCCCAGGGTCTTC                       | CATCTGATCCAGGGTTTCCA                     |
|                            | <b><i>TIMP1</i></b>  | CCAGCGTTATGAGATCAAGA                     | AGTATCCGCAGACACTCTCC                     |
|                            | <b><i>TIMP2</i></b>  | GAAGAGCCTGAACCACAGGT                     | CGGGGAGGAGATGTAGCAC                      |
|                            | <b><i>MMP1</i></b>   | GCTAACCTTTGATGCTATAACTACGA               | TTTGTGCGCATGTAGAATCTG                    |
|                            | <b><i>MMP2</i></b>   | GTTCCCCTTCTTGTTCAATG                     | CTTGCCATCCTTCTCAAAGT                     |
|                            | <b><i>MMP14</i></b>  | GGGTGAGGAATAACCAAGTG                     | CTTCCTCTCGTAGGCAGTGT                     |
